# Supplementary material for: The redox mechanism of NpVI with hydrazine: a DFT study
Source: Royal Society of Chemistry journal article supplement (doi:10.1039/c6ra13339h), 2016-01-01
Supplement: c6ra13339h1.pdf [file c6ra13339h1.pdf]

## Electronic Supplementary Information

### The Redox Mechanism of $\text{Np}^{\text{VI}}$ with Hydrazine: A DFT Study

Zhong-Ping Cheng,<sup>‡ab</sup> Qun-Yan Wu,<sup>‡a</sup> Yun-Hai Liu,<sup>b</sup> Jian-Hui Lan,<sup>a</sup>

Cong-Zhi Wang,<sup>a</sup> Zhi-Fang Chai,<sup>ac</sup> and Wei-Qun Shi<sup>\*a</sup>

<sup>a</sup>Laboratory of Nuclear Energy Chemistry and Key Laboratory for Biomedical Effects of Nanomaterials and Nanosafety, Institute of High Energy Physics, Chinese Academy of Sciences, Beijing, 100049, China

<sup>b</sup>School of Chemistry, Biological and Materials Sciences, East China University of Technology, Nanchang 330013, China

<sup>c</sup>School of Radiological and Interdisciplinary Sciences (RAD-X), and Collaborative Innovation Center of Radiation Medicine of Jiangsu Higher Education Institutions, Soochow University, Suzhou 215123, China

<sup>‡</sup>The first two authors contributed equally to this work.

<sup>\*</sup>Corresponding information. Email: shiwq@ihep.ac.cn

## Benchmark of functionals and basis sets

As we known, it is crucial to select the appropriate functional and basis set for theoretical study, especially for the relativistic atom such as Np. Therefore, to test the influence of the different functionals and basis sets on the geometries, we have investigated the reactant  $[\text{Np}^{\text{VI}}\text{O}_2(\text{H}_2\text{O})_5]^{2+}$  and the product  $[\text{Np}^{\text{V}}\text{O}_2(\text{H}_2\text{O})_5]^{2+}$  as representatives applying with the generalized gradient approximation (GGA, PBE and BP86), hybrid GGA (B3LYP) and hybrid meta GGA (M06) as well as basis sets such as 6-31g\*, 6-311+g\* and 6-311++g\*\*. The calculated bond lengths of  $\text{Np}^{\text{VI}}\text{-O}_{\text{yl}}$ ,  $\text{Np}^{\text{VI}}\text{-O}_{\text{eq}}$ ,  $\text{Np}^{\text{V}}\text{-O}_{\text{yl}}$  and  $\text{Np}^{\text{V}}\text{-O}_{\text{eq}}$  ( $\text{O}_{\text{yl}}$  and  $\text{O}_{\text{eq}}$  refer to the axial oxygen atom and the equatorial oxygen atom, respectively) at the different level of theory are listed in Table S1 of the ESI<sup>†</sup>. It can be known from it that the calculated  $\text{Np}^{\text{VI}}\text{-O}_{\text{yl}}$  bond length of 1.739 Å with the B3LYP functional and 6-31g\* basis set is almost same with the experimental value of 1.738 Å [1]. Although the relative error of the calculated  $\text{Np}^{\text{VI}}\text{-O}_{\text{eq}}$  bond length (1.5%) compared with the experimental value [1] using the B3LYP functional and 6-311++g\*\* basis set is the smallest, and the corresponding value (2.0%) using the B3LYP functional and 6-31g\* basis set is also acceptable. Besides, the relative error of the  $\text{Np}^{\text{V}}\text{-O}_{\text{eq}}$  bond length (0.5%) compared to the experimental value [2] using the B3LYP functional and 6-31g\* basis set is also the smallest among all the level of theory. The  $\text{Np}^{\text{V}}\text{-O}_{\text{yl}}$  bond length of 1.831 Å is extremely close to the experimental value of 1.830 Å [2] using the BP86 functional and 6-311+g\* basis set, but the relative error of the  $\text{Np}^{\text{V}}\text{-O}_{\text{yl}}$  bond length (1.6%) using the B3LYP functional and 6-31g\* basis set is also acceptable. In summary, the B3LYP functional and 6-31g\* basis set for this work is reasonable and acceptable.

Table S1 Np-O Bond Length of  $[\text{Np}^{\text{VI}}\text{O}_2(\text{H}_2\text{O})_5]^{2+}$  and  $[\text{Np}^{\text{V}}\text{O}_2(\text{H}_2\text{O})_5]^{2+}$  with Different Functionals and Basis Sets.

| Bond length                                  | Basis set  | Method |       |       |       | Expt.              |
|----------------------------------------------|------------|--------|-------|-------|-------|--------------------|
|                                              |            | PBE    | BP86  | B3LYP | M06   |                    |
| $\text{Np}^{\text{VI}}\text{-O}_{\text{yl}}$ | 6-31g*     | 1.760  | 1.765 | 1.739 | 1.715 | 1.738 <sup>a</sup> |
|                                              | 6-311+g*   | 1.759  | 1.763 | 1.735 | 1.711 |                    |
|                                              | 6-311++g** | 1.757  | 1.761 | 1.734 | 1.710 |                    |
| $\text{Np}^{\text{VI}}\text{-O}_{\text{eq}}$ | 6-31g*     | 2.432  | 2.435 | 2.430 | 2.440 | 2.479 <sup>a</sup> |
|                                              | 6-311+g*   | 2.421  | 2.421 | 2.430 | 2.426 |                    |
|                                              | 6-311++g** | 2.435  | 2.434 | 2.442 | 2.439 |                    |
| $\text{Np}^{\text{V}}\text{-O}_{\text{yl}}$  | 6-31g*     | 1.822  | 1.825 | 1.801 | 1.785 | 1.830 <sup>b</sup> |
|                                              | 6-311+g*   | 1.826  | 1.831 | 1.804 | 1.787 |                    |
|                                              | 6-311++g** | 1.819  | 1.827 | 1.800 | 1.775 |                    |
| $\text{Np}^{\text{V}}\text{-O}_{\text{eq}}$  | 6-31g*     | 2.559  | 2.546 | 2.541 | 2.553 | 2.520 <sup>b</sup> |
|                                              | 6-311+g*   | 2.539  | 2.538 | 2.532 | 2.533 |                    |
|                                              | 6-311++g** | 2.552  | 2.560 | 2.549 | 2.531 |                    |

<sup>a</sup>The experimental value is derived from ref. [1].

<sup>b</sup>The experimental value is derived from ref. [2].

Table S2 Electron Density [ $\rho(r)$ , au], Its Laplacian [ $\nabla^2\rho(r)$ , au], and the Total Energy Density [ $H(r)$ , au] at the BCP of All Species in the Pathway II

|                          | O <sub>yl</sub> -H <sup>a</sup> |                     |                     | N-H <sup>a</sup>   |                     |                     | Np-O <sub>yl</sub> |                   |        |
|--------------------------|---------------------------------|---------------------|---------------------|--------------------|---------------------|---------------------|--------------------|-------------------|--------|
|                          | $\rho(r)$                       | $\nabla^2\rho(r)$   | $H(r)$              | $\rho(r)$          | $\nabla^2\rho(r)$   | $H(r)$              | $\rho(r)$          | $\nabla^2\rho(r)$ | $H(r)$ |
| <b>int1</b>              | 0.274 <sup>b</sup>              | -1.240 <sup>b</sup> | -0.373 <sup>b</sup> | 0.062 <sup>b</sup> | 0.139 <sup>b</sup>  | -0.008 <sup>b</sup> | -                  | -                 | -      |
| <b>ts1<sup>II</sup></b>  | 0.179 <sup>b</sup>              | -0.396 <sup>b</sup> | -0.183 <sup>b</sup> | 0.140 <sup>b</sup> | -0.138 <sup>b</sup> | -0.099 <sup>b</sup> | -                  | -                 | -      |
| <b>int1<sup>II</sup></b> | 0.053 <sup>b</sup>              | 0.158 <sup>b</sup>  | -0.003 <sup>b</sup> | 0.288 <sup>b</sup> | -1.400 <sup>b</sup> | -0.388 <sup>b</sup> | -                  | -                 | -      |
| <b>ic2<sup>II</sup></b>  | 0.015                           | 0.053               | -0.001              | 0.322              | -1.665              | -0.449              | 0.324              | 0.206             | -0.322 |
| <b>ts2<sup>II</sup></b>  | 0.045                           | 0.102               | -0.002              | 0.094              | -0.067              | -0.029              | 0.318              | 0.252             | -0.311 |
| <b>int2<sup>II</sup></b> | 0.315                           | -1.670              | -0.469              | -                  | -                   | -                   | 0.171              | 0.372             | -0.078 |
| <b>ic3<sup>II</sup></b>  | 0.017                           | 0.058               | 0.001               | 0.313              | -1.623              | -0.434              | 0.321              | 0.229             | -0.314 |
| <b>ts3<sup>II</sup></b>  | 0.048                           | 0.109               | -0.002              | 0.109              | -0.125              | -0.046              | 0.310              | 0.257             | -0.295 |
| <b>int3<sup>II</sup></b> | 0.315                           | -1.660              | -0.468              | -                  | -                   | -                   | 0.167              | 0.377             | -0.074 |
| <b>ic4<sup>II</sup></b>  | -                               | -                   | -                   | 0.295              | -1.513              | -0.407              | 0.331              | 0.210             | -0.333 |
| <b>ts4<sup>II</sup></b>  | 0.048                           | 0.087               | -0.004              | 0.097              | -0.087              | -0.041              | 0.314              | 0.210             | -0.303 |
| <b>int4<sup>II</sup></b> | 0.318                           | -1.683              | -0.473              | -                  | -                   | -                   | 0.168              | 0.372             | -0.075 |

<sup>a</sup>H represents H2-H4 in N<sub>2</sub>H<sub>4</sub> corresponding to stages 2, 3 and 4 of Pathway II.

<sup>b</sup>H and O represent the H<sub>eq</sub> and O<sub>eq</sub> of H<sub>2</sub>O in the equatorial plane corresponding to stage 1 of Pathway II.

Table S3 Calculated O<sub>yl</sub>-H, Np-O<sub>yl</sub> and N-H WBIs and Mayer Bond Orders of All Species in the Stages 1 and 2 of Pathway III at the B3LYP/6-31g\*/ECP60MWB Level of Theory

|                           | WBI                             |                    |                  | Mayer bond order                |                    |                  |
|---------------------------|---------------------------------|--------------------|------------------|---------------------------------|--------------------|------------------|
|                           | O <sub>yl</sub> -H <sup>a</sup> | Np-O <sub>yl</sub> | N-H <sup>a</sup> | O <sub>yl</sub> -H <sup>a</sup> | Np-O <sub>yl</sub> | N-H <sup>a</sup> |
| <b>ts1<sup>III</sup></b>  | 0.295                           | 0.593              | 0.444            | 0.376                           | 0.592              | 0.355            |
| <b>int1<sup>III</sup></b> | 0.584                           | 0.436              | 0.116            | 0.567                           | 0.423              | 0.152            |
| <b>int2<sup>III</sup></b> | -                               | 1.202              | 0.718            | -                               | 1.095              | 0.655            |
| <b>ts2<sup>III</sup></b>  | 0.335                           | 0.578              | 0.381            | 0.453                           | 0.585              | 0.253            |
| <b>int3<sup>III</sup></b> | 0.665                           | 0.403              | -                | 0.643                           | 0.380              | -                |

<sup>a</sup>H represents **H2** (for **ts1<sup>III</sup>** and **int1<sup>III</sup>**) and **H4** (for **int2<sup>III</sup>**, **ts2<sup>III</sup>** and **int3<sup>III</sup>**) in N<sub>2</sub>H<sub>4</sub>.

Table S4 Electron Density [ $\rho(r)$ , au], Its Laplacian [ $\nabla^2\rho(r)$ , au], and the Total Energy

Density [ $H(r)$ , au] at the BCPs of All Species in the Stages 1 and 2 of Pathway III

|                           | $O_{yl}-H^a$ |                   |        | $N-H^a$   |                   |        | $Np-O_{yl}$ |                   |        |
|---------------------------|--------------|-------------------|--------|-----------|-------------------|--------|-------------|-------------------|--------|
|                           | $\rho(r)$    | $\nabla^2\rho(r)$ | $H(r)$ | $\rho(r)$ | $\nabla^2\rho(r)$ | $H(r)$ | $\rho(r)$   | $\nabla^2\rho(r)$ | $H(r)$ |
| <b>ts1<sup>III</sup></b>  | 0.087        | 0.091             | -0.023 | 0.147     | -0.319            | -0.120 | 0.058       | 0.181             | -0.002 |
| <b>int1<sup>III</sup></b> | 0.294        | -1.460            | -0.423 | 0.046     | 0.120             | -0.003 | 0.053       | 0.188             | -0.001 |
| <b>int2<sup>III</sup></b> | -            | -                 | -      | 0.291     | -1.415            | -0.394 | 0.160       | 0.377             | -0.065 |
| <b>ts2<sup>III</sup></b>  | 0.045        | 0.031             | -0.006 | 0.110     | -0.181            | -0.075 | 0.053       | 0.161             | -0.002 |
| <b>int3<sup>III</sup></b> | 0.325        | -1.787            | -0.498 | -         | -                 | -      | 0.050       | 0.170             | -0.001 |

<sup>a</sup>H represents H2 (for **ts1<sup>III</sup>** and **int1<sup>III</sup>**) and H4 (for **int2<sup>III</sup>**, **ts2<sup>III</sup>** and **int3<sup>III</sup>**) in  $N_2H_4$ .

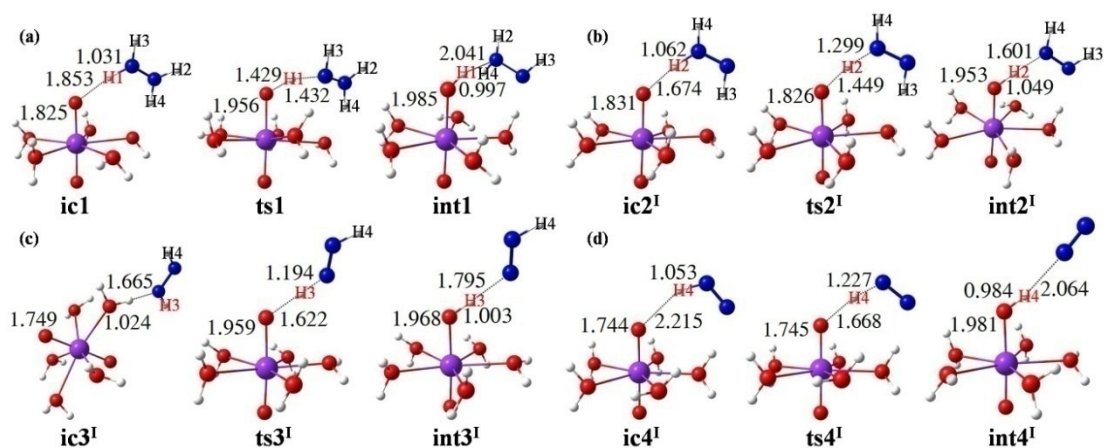

Fig. S1 Structures and selected bond lengths of all species in the Pathway I at the B3LYP/ECP60MWB/6-31g\* level of theory (neptunium: purple, oxygen: red, nitrogen: blue, hydrogen: white).

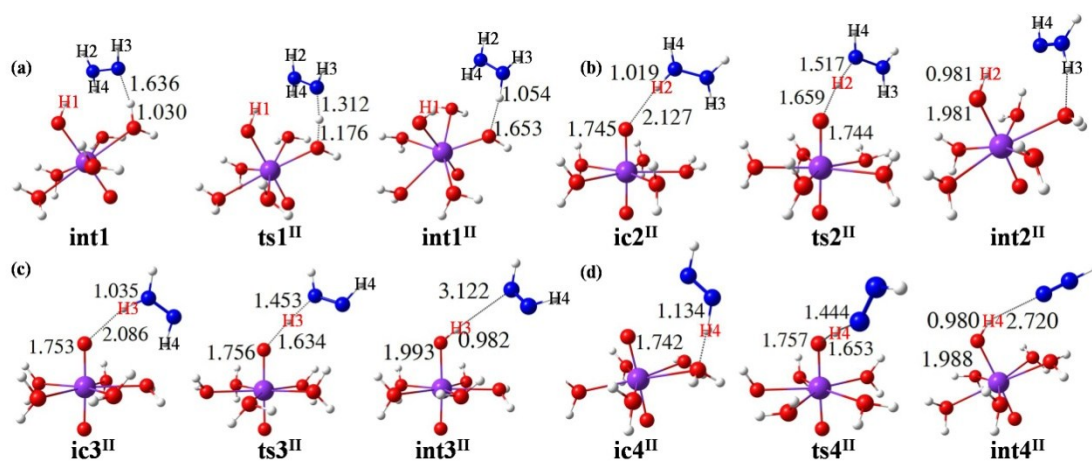

Fig. S2 Structures and selected bond lengths of all species in the Pathway II at the B3LYP/ECP60MWB/6-31g\* level of theory.

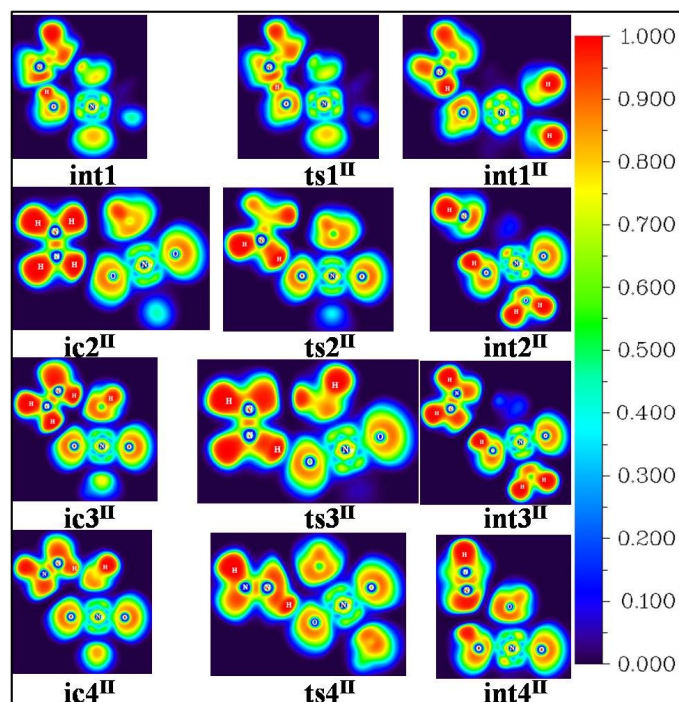

Fig. S3 Two dimensioned ELF contours of all speices on the Np-O<sub>eq</sub>-N plane for stage 1 and Np-O<sub>yl</sub>-N plane for stages 2, 3 and 4 of Pathway II.

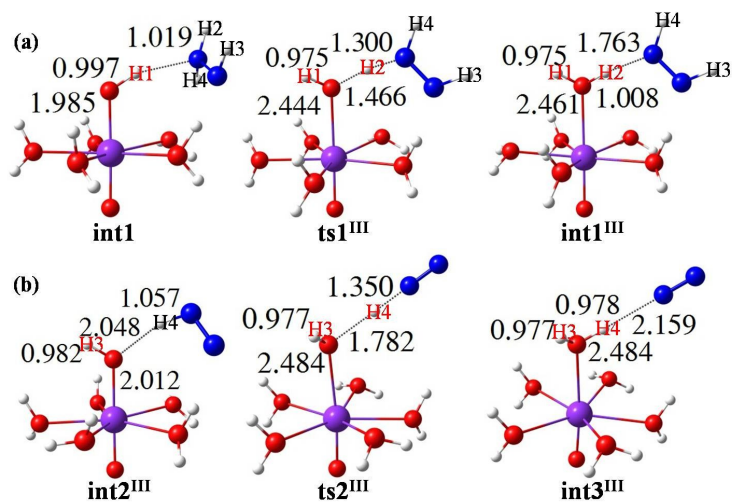

Fig. S4 Structures and selected bond lengths of all species in the stages 1 and 2 of Pathway III at the B3LYP/ECP60MWB/6-31g\* level of theory.

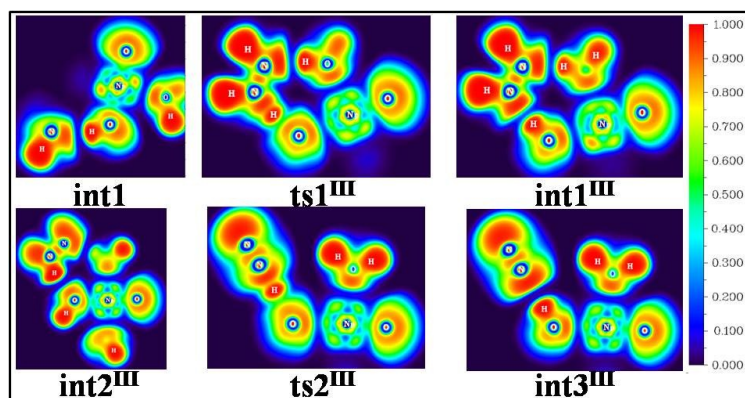

Figure S5 Two dimensioned ELF contours of all species on the Np-O<sub>yI</sub>-N plane for the transfer of H2 and H4 in stages 1 and 2 of Pathway III.

## References

- [1] P. Lindqvist-Reis, C. Apostolidis, O. Walter, R. Marsac, N. L. Banik, M. Y. Skripkin, J. Rothe and A. Morgenstern, *Dalton Trans.*, 2013, **42**, 15275-15279.
- [2] Z. Cao and K. Balasubramanian, *J. Chem. Phys.*, 2005, **123**, 114309.
